# Supplementary material
Source: Springer Nature journal article supplement (https://www.springermedizin.de/resource/supplementary/12986_2011_406_MOESM1_ESM.pdf/25656172)

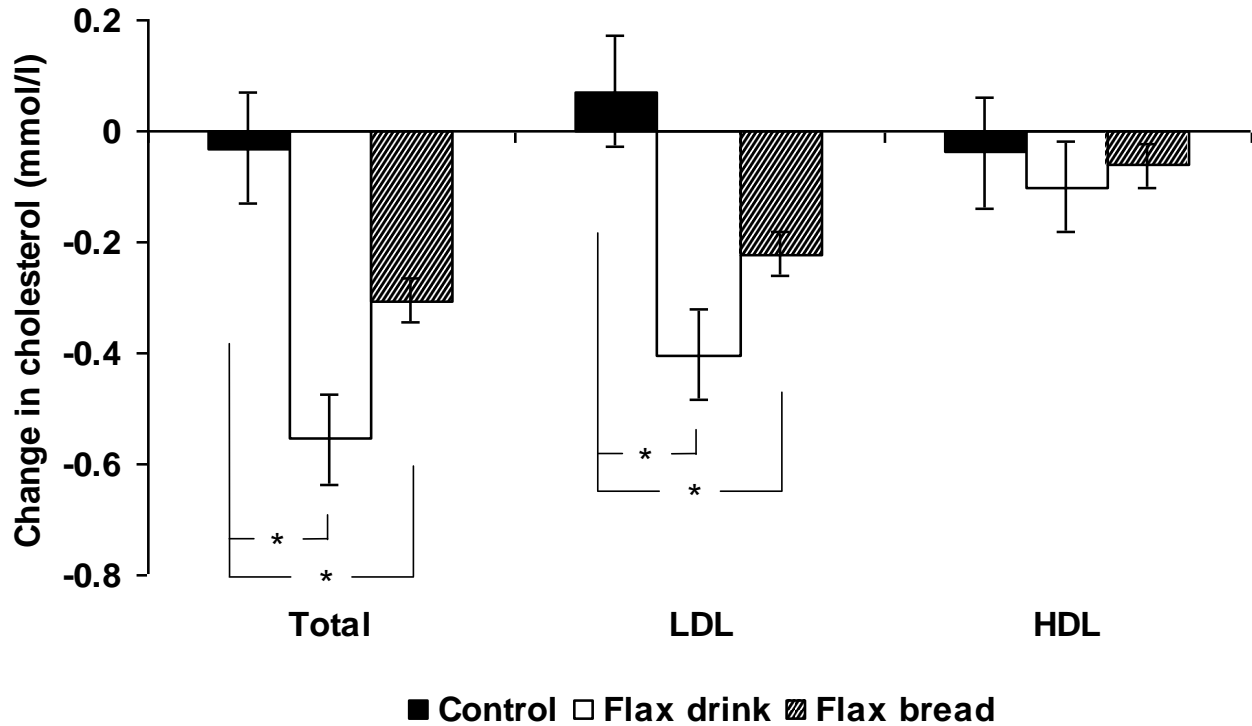

Supplement: MOESM1 [file 25656172]
